# Supplementary material for: Technical note: On the reliability of laboratory beta-source calibration for luminescence dating
Source: Copernicus journal article supplement (doi:10.5194/gchron-3-371-2021), 2021-06-23
Supplement: Supplementary file 2 [file gchron-3-371-2021-supplement.zip]

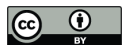

## *Supplement of*

# **Technical note: On the reliability of laboratory beta-source calibration for luminescence dating**

**Barbara Mauz et al.**

*Correspondence to:* Barbara Mauz ([barbara.mauz@sbg.ac.at](mailto:barbara.mauz@sbg.ac.at))

- `gchron-3-371-2021-supplement-title-page.pdf`
- `SrSource`
  - `CMakeLists.txt`
  - `Sr90_spectra.txt`
  - `SrSource.cc`
  - `include`
    - \* `ActionInitialization.hh`
    - \* `DetectorConstruction.hh`
    - \* `PhysicsList.hh`
    - \* `PrimaryGeneratorAction.hh`
    - \* `RunAction.hh`
    - \* `SteppingAction.hh`
  - `m.sh`
  - `run.mac`
  - `src`
    - \* `ActionInitialization.cc`
    - \* `DetectorConstruction.cc`
    - \* `PhysicsList.cc`
    - \* `PrimaryGeneratorAction.cc`
    - \* `RunAction.cc`
    - \* `SteppingAction.cc`
  - `vis.mac`
- `Supplement.pdf`

The copyright of individual parts of the supplement might differ from the article licence.
